# Interdigitating Dendritic Cell Sarcoma

## A Report of Four Cases and Review of the Literature

Erich M. Gaertner, MD,<sup>1</sup> Maria Tsokos, MD,<sup>3</sup> Gregory A. Derringer, MD,<sup>4</sup>  
Thomas S. Neuhauser, MD,<sup>4</sup> Cletus Arciero, MD,<sup>2</sup> and Jo-Ann W. Andriko, MD<sup>4</sup>

**Key Words:** Interdigitating dendritic sarcoma; Accessory cells; Neoplasm; Lymph node; Tonsil

### Abstract

To better define the clinical and pathologic features of interdigitating dendritic cell sarcoma (IDCS), we report 4 cases, including the first reported in the tonsil. There were 2 male and 2 female patients (mean age, 70 years). Sites of tumor included 1 case each in the right cervical lymph node, left axillary lymph node, right tonsil, and right inguinal lymph node. Histologically, all showed diffuse effacement of the lymphoid tissue by pleomorphic round to spindled cells with convoluted nuclei and abundant eosinophilic cytoplasm. All were immunoreactive for S-100, CD68, lysozyme, and vimentin. CD45 was positive in 3 cases and CD1a in 1 case. Fascin was positive in 3 cases. Other immunostains, including CD3, CD20, CD21, CD30, actin, cytokeratin, and HMB-45, were negative. Ultrastructurally, the tumor cells were elongated and showed indented nuclei, variable numbers of lysosomes, and interdigitating cytoplasmic processes. Follow-up was available for all cases. One patient died of widespread disease 2 months after diagnosis. One was alive with metastatic lung disease at 12 months. Two patients were disease free at 5 and 9 months.

Interdigitating dendritic cells are arachnoid nonlymphoid accessory cells found in the T-cell areas of peripheral lymphoid tissue, including the paracortex and deep cortex of lymph nodes, the splenic periarteriolar lymphoid sheaths, and the interfollicular areas of mucosa-associated lymphoid tissue.<sup>1-4</sup> They are potent antigen-presenting cells responsible for initiating primary T-lymphocyte immune responses.<sup>2,3,5</sup> Interdigitating dendritic cells are immunoreactive with S-100–like Langerhans cells and have a similar light microscopic appearance. However, in contrast with Langerhans cells, they lack Birbeck granules ultrastructurally and consistent CD1a immunostaining.<sup>1,6-26</sup> Neoplasms derived from interdigitating dendritic cells are rare, with only 25 cases previously reported in the literature. Their pathologic diagnosis often is challenging because they mimic other primary and metastatic spindle cell neoplasms of lymph nodes. The reported cases highlight this rare malignant neoplasm; describe the morphologic, immunohistochemical, and ultrastructural features; and expand the known sites of occurrence.

### Materials and Methods

H&E-stained slides, paraffin-embedded tissue blocks, and a clinical history were available for each case. For case 1, small pieces of tissue were fixed in glutaraldehyde for electron microscopic evaluation. Immunohistochemical analysis was performed using the standard avidin-biotin-peroxidase method with a panel of antibodies<sup>27</sup> (Table 1). When necessary, predigestion with 0.04% pepsin at pH 2.0 for 20 minutes at 40°C was performed. Microwave antigen retrieval involved heating sections in a microwave oven in a 1-mmol/L concentration of EDTA buffer solution at pH 8.0 for 10 minutes.

**Table 1**  
**Antibodies Used and Sources**

| Antibody (Clone)                | Type | Source                        | Dilution | Pretreatment |
|---------------------------------|------|-------------------------------|----------|--------------|
| Cytokeratin (AE1/AE3)           | M    | Boehringer, Indianapolis, IN  | 1:400    | Enzyme       |
| Vimentin (V9)                   | M    | DAKO, Carpinteria, CA         | 1:80     | Enzyme       |
| S-100                           | R    | DAKO                          | 1:100    | —            |
| HMB-45                          | M    | ENZO BIOCHEM, Farmingdale, NY | 1:2,000  | —            |
| Alpha <sub>1</sub> -antitrypsin | R    | DAKO                          | 1:1,000  | Enzyme       |
| Lysozyme                        | R    | DAKO                          | 1:1,000  | Enzyme       |
| Smooth muscle actin (1A4)       | M    | Sigma, St Louis, MO           | 1:1,200  | —            |
| CD1a (010)                      | M    | Immunotech, Miami, FL         | 1:4      | Microwave    |
| CD3                             | R    | DAKO                          | 1:500    | Enzyme       |
| CD20 (L26)                      | M    | DAKO                          | 1:200    | —            |
| CD21 (1F8)                      | M    | DAKO                          | 1:50     | Enzyme       |
| CD30 (Ber H2)                   | M    | DAKO                          | 1:100    | Enzyme       |
| CD35                            | M    | DAKO                          | 1:100    | Enzyme       |
| CD45RB (PD7/26, 2B11)           | M    | DAKO                          | 1:200    | —            |
| CD45RO (UCHL-1)                 | M    | DAKO                          | 1:200    | —            |
| CD68 (KP-1)                     | M    | DAKO                          | 1:500    | Enzyme       |
| Fascin (55K2)                   | M    | CELL MARQUE, Austin, TX       | 1:20     | Microwave    |
| Desmin (D33)                    | M    | DAKO                          | 1:100    | Enzyme       |
| Factor XIII                     | R    | CALBIOCHEM, San Diego, CA     | 1:800    | Enzyme       |
| p53                             | M    | DAKO                          | 1:100    | Microwave    |

M, mouse monoclonal; R, rabbit polyclonal.

Electron microscopy was performed on 3 cases (1-3). Poor fixation precluded ultrastructural analysis of case 4. For case 1, fresh tissue fixed in 2.5% glutaraldehyde was used. For cases 2 and 3, formalin-fixed tissue was removed from the paraffin block, deparaffinized in xylene, and postfixed in glutaraldehyde. All tissue was postfixed in buffered osmium tetroxide, dehydrated in ethanol, and embedded in Maraglas-655 (Ladd Research Industries, Burlington, VT). Ultrathin sections were prepared, stained with uranyl nitrate-lead citrate, and examined using a transmission electron microscope (CM10, Philips).

## Case Reports

### Case 1

A 61-year-old man sought care because of a 5-month history of a painless, gradually enlarging mass on the posterior right side of the neck. He was examined in the surgery clinic with a presumed diagnosis of lipoma vs epidermal inclusion cyst. His medical history included hypertension, multiple colonic polyps, and aortic valvular stenosis. He had a distant history of tobacco use. The physical examination revealed a 2-cm subcutaneous nodule on the posterior right side of the neck without appreciable regional adenopathy. The mass was nontender and mobile. A 1-cm, mobile, nontender nodule also was identified on the left side of the chest in proximity to the nipple. No other abnormalities were identified.

An excisional biopsy of the neck mass was performed, resulting in an initial diagnosis of malignant spindle cell

neoplasm. A chest computed tomography (CT) scan revealed a 4.7-cm suprahilar lung mass, a 9-cm mass along the posterior costophrenic sulcus, and a 1.2-cm subcutaneous nodule in the left side of the chest, and marked mediastinal and subcarinal lymphadenopathy was identified. An abdominal CT scan revealed an enlarged spleen measuring 19 cm. Laboratory studies showed mild anemia and thrombocytopenia, with a hematocrit of 32.6% (0.33) and a platelet count of  $82 \times 10^3/\mu\text{L}$  ( $82 \times 10^9/\text{L}$ ), and an elevated alkaline phosphatase level (284 U/L). Results of all other laboratory studies were within the reference ranges.

The patient underwent wide local excision of the neck mass for therapeutic and diagnostic purposes. The patient received 4 cycles of CHOP chemotherapy (cyclophosphamide, doxorubicin, vincristine [Oncovin], and prednisone) without significant response. The patient was alive with persistent disease at 1.5 years.

### Case 2

A 70-year-old man was examined because of a slowly growing left axillary mass for 3 months. He had undergone a low anterior resection for colon cancer 6 years earlier, which was complicated by local tumor recurrence. The patient received chemotherapy (leucovorin and 5-fluorouracil) and radiation. There had been no evidence of colon cancer for 2 years at the last follow-up for that diagnosis.

Physical examination revealed that the left axillary mass was soft, mobile, and nontender, measuring 6.5 cm in greatest dimension. After a diagnosis of interdigitating dendritic cell sarcoma (IDCS), further radiologic and clinical workup did not identify any other sites of disease, and the

patient opted for no further therapy. The patient was alive and free of disease at 9 months.

### Case 3

A 77-year-old woman sought care because of unilateral right tonsillar enlargement. She had a 1-year history of stage IV B-cell small lymphocytic lymphoma and had completed 6 cycles of chemotherapy (cisplatin, vincristine, prednisone) with regression of disease. The patient was otherwise without complaints, except for a stable postchemotherapy distal neuropathy. Excision of the affected tonsil yielded a  $2.5 \times 1.8 \times 0.6$ -cm tonsil with a tan, polypoid mass measuring  $1.5 \times 1.2 \times 0.5$  cm. No other sites of disease were identified. After the diagnosis of IDCS, the patient was treated with local radiation and was free of disease at 5 months of follow-up.

### Case 4

A 73-year-old woman without clinically significant medical history findings was examined because of an enlarged right inguinal lymph node. She denied systemic symptoms. Excision of the enlarged lymph node revealed a  $3.5 \times 3.0 \times 1.8$ -cm node with central necrosis. She refused additional therapy and died of widespread disease 2 months after diagnosis.

## Results

Macroscopically, the neoplasms were firm, relatively circumscribed, and white to tan. Tumor size ranged from 1.5 to 6.0 cm. Necrosis was identified in 1 case (case 4).

Microscopically, lymph nodes (cases 1, 2, and 4) were diffusely effaced by a proliferation of medium to large spindle-shaped cells with a fascicular or whorled growth pattern **Image 1** and **Image 2**. The individual neoplastic cells had round to ovoid, vesicular nuclei, often with deeply cleaved, irregular nuclear membranes **Image 3**. Nucleoli were generally prominent. Case 3, involving the tonsil, showed ulceration of the overlying epithelium and infiltrates of discohesive large cells with lobated nuclei and abundant eosinophilic cytoplasm **Image 4** and **Image 5**. Multinucleated cells and large pleomorphic cells up to 60  $\mu$ m were prominent in case 2. Cells with a xanthomatous appearance were also present in case 2. The maximum mitotic rate was 9 mitoses per 10 high-powered fields. In all cases, small lymphocytes and plasma cells were intermixed with neoplastic cells. Collagen deposition was identified primarily between fascicles in all cases and was most prominent in case 1. Eosinophils were not observed in any of the cases.

The immunohistochemical results are summarized in **Table 2**. All cases were positive for S-100, CD68, and lysozyme. CD68 showed a granular cytoplasmic staining pattern and accentuated the dendritic cellular morphologic features **Image 6**, while lysozyme showed focal (case 1) to diffuse (cases 2-4) cytoplasmic staining. Fascin was positive in 3 of 4 cases with diffuse cytoplasmic staining. CD45RB was positive in 3 cases, with the malignant cells showing less intense staining than the background lymphocytes **Image 7**. CD1a showed weak patchy staining in 1 case **Image 8**. Strong nuclear staining was demonstrated for p53 in the neoplastic cells in 3 of 4 cases evaluated (1, 2, and 4). The tumor cells were negative for CD3, CD20 (in the 1 case evaluated), CD21, CD30, cytokeratin, smooth muscle actin,

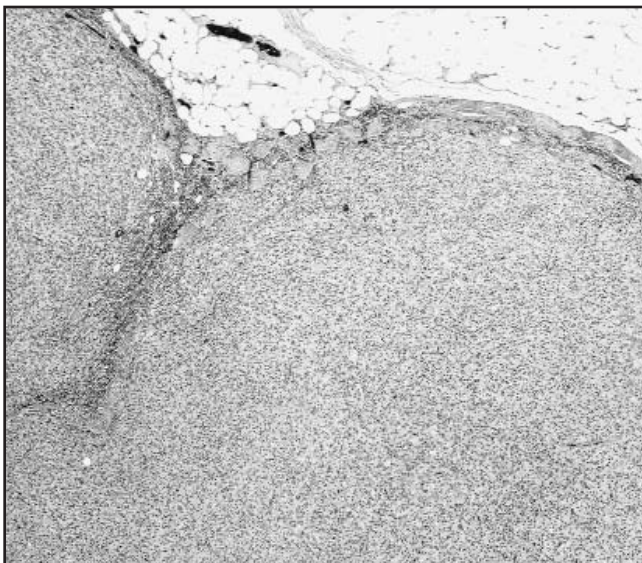

**Image 1** Lymph node specimen showing diffuse architectural effacement (H&E,  $\times 37$ ).

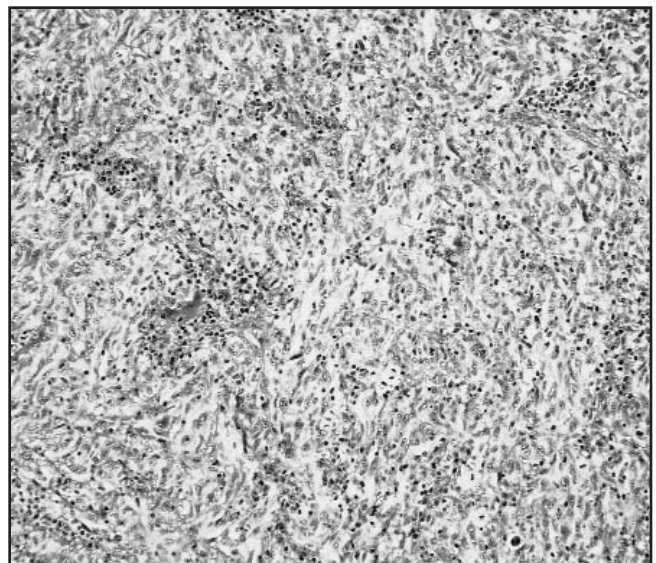

**Image 2** Tumor cells arranged in ill-defined whorls (H&E,  $\times 100$ ).



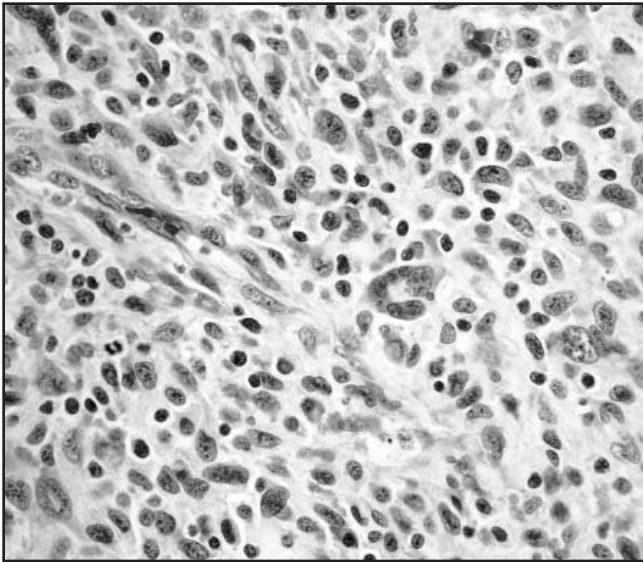

**Image 3** Spindle cells with vesicular nuclei and ill-defined cytoplasmic borders. Note scattered multinucleated giant cells (H&E, ×385).

desmin (2 cases evaluated), HMB-45, and factor XIII. In addition, the tumor cells were negative for CD35 in 2 cases evaluated (cases 1 and 3).

Ultrastructural evaluation showed elongated tumor cells with prominent interdigitating processes **Image 9**. The nuclei were indented and irregularly shaped. The majority of tumor cells demonstrated rough endoplasmic reticulum and lysosomes and a sparse number of mitochondria **Image 10**. Occasional cells showed rare cytoplasmic filaments, short strands of basal lamina at the cell periphery, and fusiform densities. No melanosomes or Birbeck granules were identified.

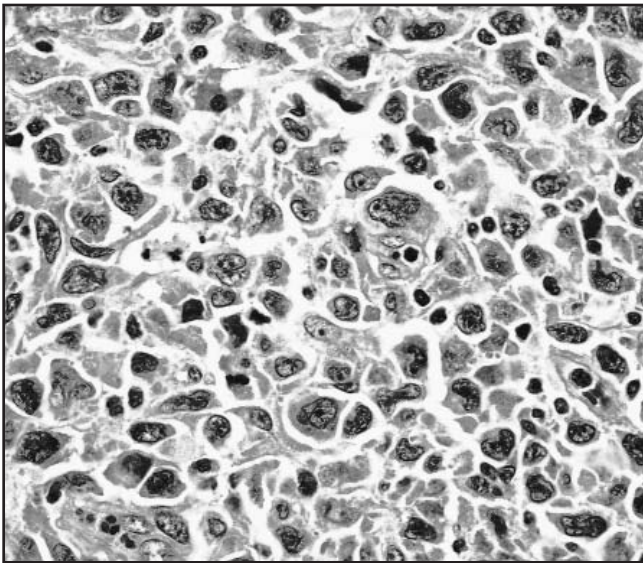

**Image 5** Pleomorphic large cells with indented nuclei and abundant cytoplasm (H&E, ×640).

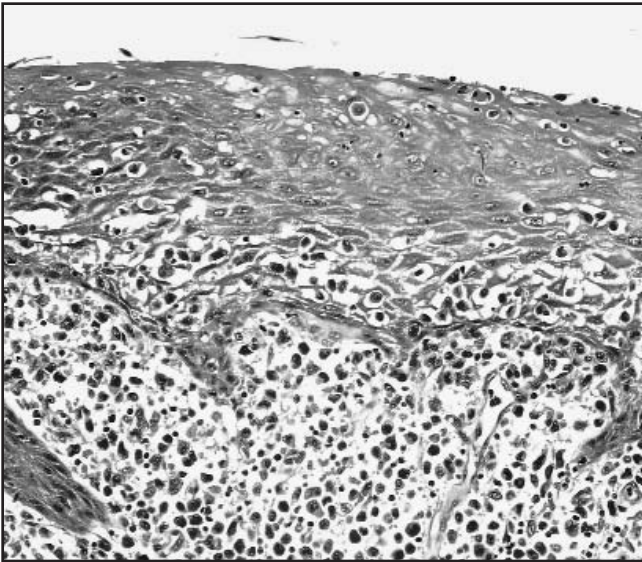

**Image 4** Tonsil showing specimen ulceration and dense subepithelial infiltrates (H&E, ×112).

Discussion

The 4 cases presented show clinical and histologic similarity to the 25 previously reported cases of interdigitating dendritic sarcoma **Table 3**. IDCS generally manifests with lymphadenopathy, rarely with associated systemic symptoms including fever and weight loss. A widely affected age range, from 8 to 77 years, has been reported, with a median age of 52 years and a slight male predominance (approximately

**Table 2**  
Immunohistochemical Findings

| Antibody                          | Case |    |    |    |
|-----------------------------------|------|----|----|----|
|                                   | 1    | 2  | 3  | 4  |
| Cytokeratin                       | –    | –  | –  | –  |
| S-100                             | +    | +  | +  | +  |
| HMB-45                            | –    | –  | –  | –  |
| Lysozyme                          | +    | +  | +  | +  |
| CD1a                              | –    | –  | +  | –  |
| CD3                               | –    | –  | –  | –  |
| CD20                              | ND   | –  | ND | ND |
| CD21                              | –    | –  | –  | –  |
| CD30                              | –    | –  | –  | –  |
| CD35                              | –    | ND | –  | ND |
| CD45RB (leukocyte common antigen) | +    | –  | +  | +  |
| CD45RO                            | –    | –  | ND | –  |
| CD68                              | +    | +  | +  | +  |
| p53                               | +    | ND | +  | +  |
| Fascin                            | +    | +  | –  | +  |
| Factor XIII                       | –    | –  | –  | –  |
| Vimentin                          | +    | +  | +  | +  |
| Smooth muscle actin               | –    | –  | –  | –  |
| Desmin                            | –    | ND | ND | –  |

ND, not done; +, positive; –, negative.



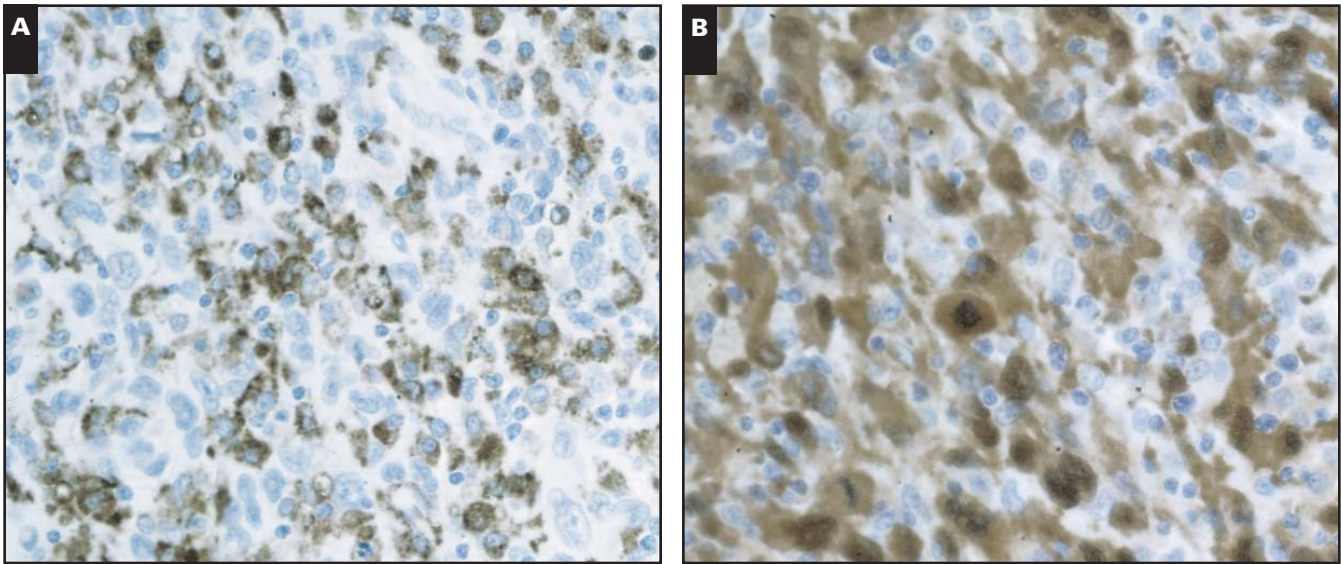

**Image 6** Positive staining for S-100 (**A**,  $\times 348$ ) and CD68 (**B**,  $\times 348$ ).

1.5:1). Four cases without documented nodal involvement manifested with mass lesions in the nasopharynx,<sup>12</sup> small intestine and mesentery,<sup>14,17</sup> and testicle.<sup>25</sup> Liver and/or spleen involvement has been described in approximately one third of the cases,<sup>6,12,16,17,21</sup> whereas bone marrow involvement is uncommon.<sup>6,16</sup> Of interest, 2 patients had clinical manifestations consistent with superior vena cava syndrome.<sup>7-9</sup> Similar to case 3 in the present series, a history of previous or concurrent hematologic malignant neoplasm was reported in 6 patients: 1 with mycosis fungoides,<sup>13</sup> 1 with precursor T-lymphoblastic leukemia,<sup>18</sup> 2 with follicle center lymphoma, and 2 with B-cell small lymphocytic lymphoma/chronic lymphocytic leukemia.<sup>20,22</sup>

Histologically, IDCS shows a diffuse proliferation of oval to spindled cells with a variety of described growth patterns, including sinusoidal, nesting, fascicular, and storiform.<sup>1,6-25</sup> The proliferation can partially or completely replace the affected tissue. A collagenous or hyalinized background, with increased reticulin, may be present.<sup>10,16</sup> Microscopically, individual cells have a slender, spindled to plump (histiocytoid) appearance with ill-defined cell borders, abundant eosinophilic cytoplasm, and enlarged indented nuclei. Scattered multinucleated cells are common. Necrosis is unusual. The mitotic rate is variable, but generally moderate, with maximum reported rate of 10 per 10 high-powered fields.<sup>25</sup> A characteristic feature is the presence of lymphocytes and plasma cells sprinkled throughout the neoplasm.<sup>7,8,19,21</sup>

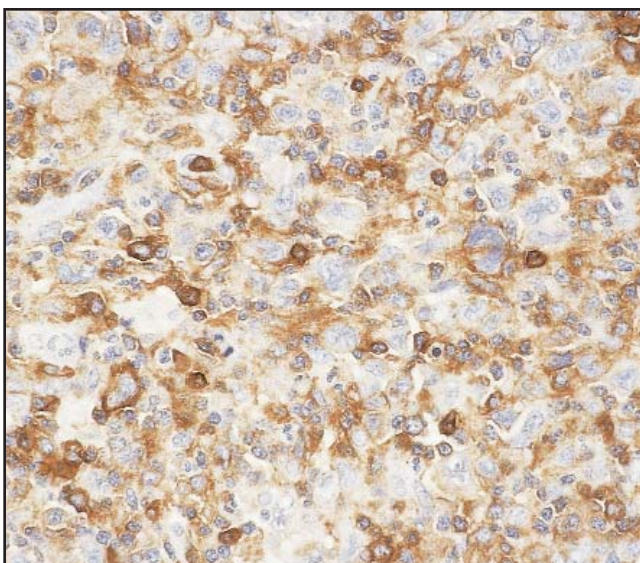

**Image 7** Positive staining for CD45RB immunostain ( $\times 400$ ).

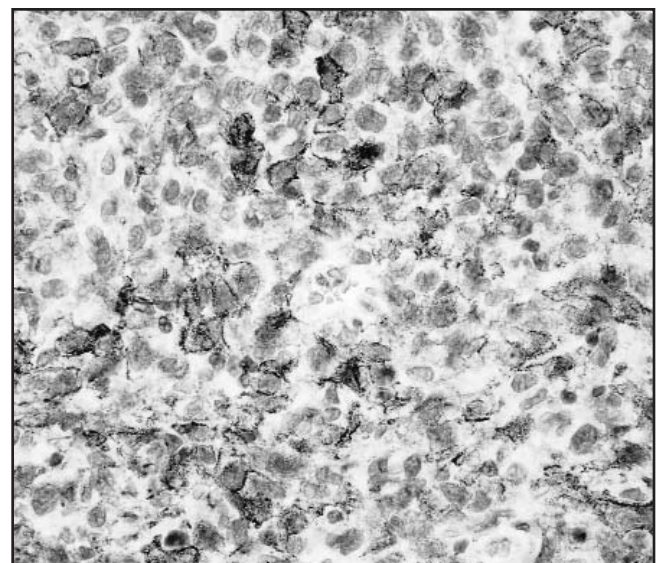

**Image 8** (Case 3) Variable immunoreactivity for CD1a ( $\times 348$ ).



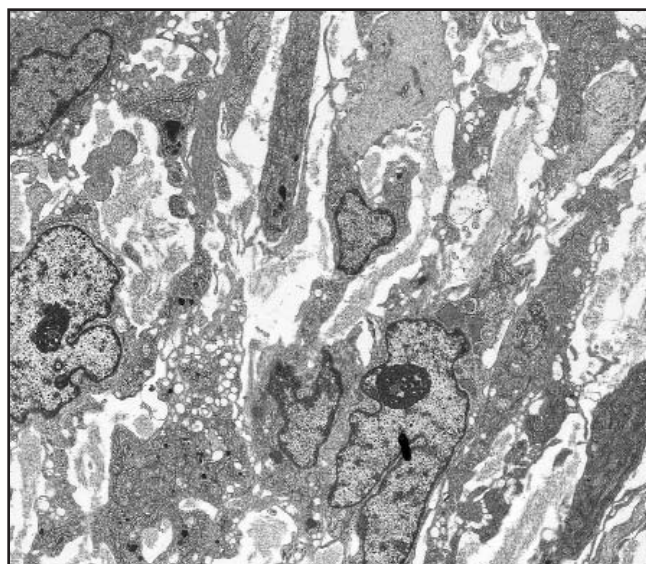

**Image 9** The tumor cells exhibit long, slender processes and indented nuclei. The cytoplasm contains well-developed endoplasmic reticulum and, in some cells, a fair number of lysosomes (x2,610).

IDCS demonstrates a spectrum of morphologic features, as described in the preceding text. Architecturally and cytologically, the neoplastic proliferation can range from dense, whorled spindle cells to haphazardly arranged, plump, histiocytoid cells. These patterns can be admixed within a single tumor. The described cases illustrate this gamut of morphologic features, with cases 1, 2, and 4 showing primarily spindled morphologic features and case 3 demonstrating randomly arrayed plump, histiocytoid cells. Although the number of reported cases is limited, histologic features do not seem to predict survival accurately. For example, necrosis, a prominent feature in case 4, also has been described in 4 other cases of IDCS, generally as small foci or individual cells.<sup>6,7,16,17</sup> Of these cases, 1 patient was alive with disease and 4 had died of disease.

There is no specific marker for IDCS, and the tumor cells demonstrate a heterogeneous immunophenotype. Similar to normal interdigitating dendritic cells, malignant interdigitating dendritic cell proliferations are positive for S-100, vimentin, HLA-DR, and CD68. Variable staining has been reported for CD1a, CD11c, CD45RB, CD45RO, CD4, and CD14.<sup>7</sup> Two reported cases demonstrated positivity for epithelial membrane antigen,<sup>16</sup> whereas other epithelial markers have been negative. IDCS is negative for CD21, CD35, CD3, and CD20. Fascin, an actin-bundling protein expressed in follicular and interdigitating dendritic cells, was positive in 3 cases and may represent a useful immunohistochemical adjunct in the diagnosis of IDCS.<sup>28,29</sup> Strong, diffuse nuclear staining with p53 was present in the 3 tested cases. Similarly, p53 overexpression has been reported in a

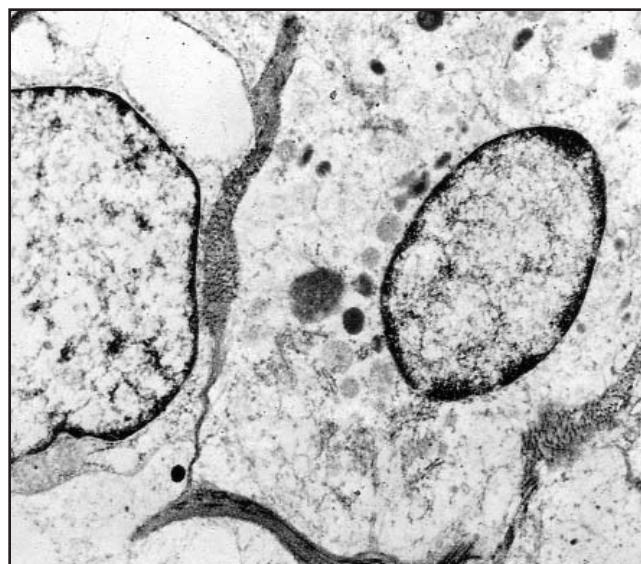

**Image 10** Higher magnification of a tumor cell shows cytoplasmic endoplasmic reticulum and multiple lysosomes (x17,186).

high percentage of hematologic malignant neoplasms, with increased staining positively correlated with grade.<sup>30,31</sup>

The variable immunophenotype may reflect the multiple pathways that have been postulated in normal dendritic cell development. The first involves epidermal Langerhans cells, which arise from CD34+ bone marrow progenitors following cytokine stimulation and migrate to the T-cell areas of lymph nodes. The second pathway produces myeloid dendritic cells, which also are derived from the bone marrow. They transiently express CD14, as well as various myeloid and macrophage antigens, and have the potential to develop into macrophages or dendritic cells. The third pathway involves lymphoid dendritic cells, which are present in the thymus and share a common progenitor with T cells. They are CD4+, CD11- and lack myelomonocytic antigens. With cytokine stimulation, they also can develop into typical dendritic cells.<sup>32-34</sup>

Ultrastructurally, IDCS shows indented nuclei with dispersed, peripherally condensed chromatin. The cytoplasm shows numerous elongated interdigitating cytoplasmic processes.<sup>1,6,10,16,17,19-21</sup> Generally, organelles are sparse, with limited mitochondria, endoplasmic reticulum, and occasional lysosomes. Golgi complexes were prominent in several reports,<sup>10,17</sup> as were focal elaborate complexes of tubules and vesicles.<sup>10,19</sup> The presence of junctional complexes and desmosomes has been reported variably, but they are generally absent.<sup>6,7,10,12,15,16,19,21,22,25</sup> Unlike Langerhans cell histiocytosis, IDCS lacks Birbeck granules.<sup>1,35</sup> Interestingly, occasional cells in case 1 demonstrated rare cytoplasmic filaments and basal lamina, a finding associated

**Table 3**  
**Present and 25 Reported Cases of Interdigitating Dendritic Cell Sarcoma**

| Authors                          | Patient Sex/Age (y) | Sites of Involvement                                                                         | Treatment                                                            | Follow-up                                 |
|----------------------------------|---------------------|----------------------------------------------------------------------------------------------|----------------------------------------------------------------------|-------------------------------------------|
| Lennert and Mohri <sup>13</sup>  | F/69                | Lymph nodes                                                                                  | Not reported                                                         | Not reported                              |
| van Heerde et al <sup>8</sup>    | M/37                | Mediastinum; cervical and axillary lymph nodes; skin                                         | Chemotherapy (C, V, P); radiation                                    | DOD, 4 mo                                 |
| and Feltkamp et al <sup>9</sup>  | M/17                | Lymph nodes; spleen; liver                                                                   | Chemotherapy (D, B, V)                                               | DOD, 4 mo                                 |
| Turner et al <sup>12</sup>       | M/30                | Nasopharynx                                                                                  | Radiation                                                            | AWD, 20 mo                                |
| Daum et al <sup>14</sup>         | M/43                | Jejunum; mesentery                                                                           | Chemotherapy (P, V, MX, D, C, ET, MC, PH); surgery                   | FOD, 5 mo (died of myocardial infarction) |
| Salisbury et al <sup>15</sup>    | F/41                | Diffuse lymphadenopathy                                                                      | Chemotherapy (M, B, DX, C, V, CI); autologous bone marrow transplant | AWD, 6 mo                                 |
| Chan and Zaatari <sup>21</sup>   | M/67                | Diffuse lymphadenopathy; spleen; liver; lungs                                                | Chemotherapy (B, D, C, V)                                            | DOD, 1 wk                                 |
| van den Oord et al <sup>10</sup> | F/74                | Axillary lymph node; mediastinum                                                             | Radiation                                                            | FOD (follow-up time not reported)         |
| Nakamura et al <sup>11</sup>     | M/58                | Cervical, mesenteric lymph nodes; jejunum                                                    | Chemotherapy (C, ME, PR, D, V, MX, P); radiation; surgery            | Alive, 5 y                                |
| Rabkin et al <sup>16</sup>       | M/17                | Diffuse lymphadenopathy; spleen; bone marrow                                                 | Chemotherapy (MX, D, C, V, B); surgery                               | DOD, 9 mo                                 |
|                                  | F/13                | Diffuse lymphadenopathy; spleen; mediastinum; ovaries                                        | Chemotherapy (C, V, corticosteroids); radiation                      | DOD, 7 wk                                 |
| Weiss et al <sup>6</sup>         | M/60                | Supraclavicular lymph node                                                                   | Surgery; radiation                                                   | FOD, 1.5 y                                |
|                                  | M/34                | Inguinal, thoracic, and abdominal lymph nodes; bone marrow; skin; liver; kidney; lung; heart | Chemotherapy; surgery; autologous bone marrow transplant             | DOD, 10 mo                                |
| Yamakawa et al <sup>19</sup>     | M/54                | Diffuse lymphadenopathy; pleural effusion                                                    | Chemotherapy (C, V, D, P)                                            | AWD, 1 y                                  |
| Hammar et al <sup>20</sup>       | M/67                | Cervical lymph node                                                                          | Surgery                                                              | FOD, 4 y                                  |
| Horschowski et al <sup>18</sup>  | M/8                 | Inguinal, submandibular lymph nodes; colomesenteric mass                                     | Chemotherapy (VIN, CYT, DA, AS, CO)                                  | DOD, 8 mo                                 |
| Miettinen et al <sup>17</sup>    | F/52                | Small intestine and abdominal masses; retroperitoneal, mediastinal lymph nodes               | Chemotherapy (MX, B, D, C, V, CI, CY, ET); surgery                   | DOD, 16 mo                                |
|                                  | M/58                | Ileum; mesentery; liver                                                                      | Chemotherapy (C, D, V, P); surgery                                   | FOD, 12 mo                                |
| Rousselet et al <sup>7</sup>     | F/20                | Cervical, supraclavicular, and mediastinal lymph nodes                                       | Chemotherapy (MX, V, B, C, P, MI, ET, IF, CA, CYH, ML); radiation    | AWD, 1 y                                  |
| Vasef et al <sup>22</sup>        | F/56                | Cervical and axillary lymph nodes                                                            | P                                                                    | Not reported                              |
| Andriko et al <sup>1</sup>       | M/23                | Cervical and axillary lymph nodes                                                            | Surgery; radiation                                                   | AWD, 4 y                                  |
|                                  | F/32                | Cervical lymph node                                                                          | Surgery                                                              | Not reported                              |
| Banner et al <sup>24</sup>       | F/68                | Cecum; regional lymph nodes                                                                  | Chemotherapy                                                         | Not reported                              |
| Luk et al <sup>25</sup>          | M/74                | Right testicle                                                                               | Surgery                                                              | FOD, 9 mo                                 |
| Hui et al <sup>23</sup>          | M/67                | Skin                                                                                         | Not reported                                                         | AWD, 6 y                                  |
| Present cases                    |                     |                                                                                              |                                                                      |                                           |
| 1                                | M/61                | Cervical and mediastinal lymph nodes; chest wall; lung; spleen                               | Chemotherapy (D, V, P, C)                                            | AWD, 1.5 y                                |
| 2                                | M/70                | Axillary lymph node                                                                          | Surgery                                                              | FOD, 9 mo                                 |
| 3                                | F/77                | Tonsil                                                                                       | Radiation                                                            | FOD, 5 mo                                 |
| 4                                | F/73                | Inguinal lymph node; widespread metastases                                                   | Surgery                                                              | DOD, 2 mo                                 |

AS, asparaginase; AWD, alive with disease; B, bleomycin; C, cyclophosphamide; CA, carmustine; CI, cisplatin; CO, cortisone; CY, cytosine arabinoside; CYH, cytarabine hydrochloride; CYT, cytarabine; D, doxorubicin; DA, daunorubicin; DOD, died of disease; DX, dexamethasone; ET, etoposide; FOD, free of disease; IF, ifosfamide; M, methotrexate; MC, mechlorethamine hydrochloride; ME, mercaptopurine; MI, mitoxantrone; ML, melphalan; MX, methotrexate; P, prednisone; PH, procarbazine hydrochloride; PR, predonine; V, vincristine; VIN, vindesine.

with fibroblastic reticular cells,<sup>1</sup> suggesting the possibility of a minor subpopulation of these cells within the sarcoma.

The differential diagnosis of IDCS has been discussed extensively in previous reports.<sup>1,6-26,36</sup> Of the nonhematopoietic spindle cell neoplasms, IDCS may be difficult to distinguish from metastatic melanoma, which can have a similar immunohistochemical profile (S-100 positive, CD68+/-).<sup>37</sup> In the reported cases, positive staining for S-100 and CD68 (4/4), fascin (3/4), and CD45RB (3/4) and the ultrastructural observation of long, intertwining cell processes, coupled

with the absence of melanosomes, were helpful in excluding metastatic melanoma. Of the hematopoietic neoplasms, IDCS shares morphologic and immunohistochemical features with other tumors of histiocytic or dendritic origin. Follicular dendritic cell tumors, in particular, have similar morphologic features and can be reliably distinguished only by their consistent immunoreactivity with the complement-related antibodies CD21 and CD35.<sup>35</sup> Langerhans cell sarcoma or malignant histiocytosis X is a rare entity, characterized by atypical and malignant-appearing Langerhans

cells and an aggressive clinical course.<sup>38</sup> Although case 3 in this series was immunoreactive for CD1a, the malignant cells did not show the characteristic cytologic features of Langerhans cells. Furthermore, inflammatory infiltrates, which often accompany Langerhans cell proliferations, were not observed.<sup>39</sup> Finally, rare cases of true histiocytic lymphoma have been described that express S-100 and multiple histiocytic antigens and show morphologic similarity with IDCS.<sup>12</sup>

Based on review of the present and previous cases, the minimal diagnostic criteria for the diagnosis of IDCS are compatible histologic features as described and positive staining for CD45RB, S-100, and CD68. In the absence of CD45RB positivity, ultrastructural examination is essential to confirm the diagnosis of IDCS.

IDCS is an aggressive neoplasm, generally unresponsive to conventional therapy and leading to widespread disease. Of the 24 cases with follow-up, 9 patients died of disease and 7 were alive with persistent or progressive disease after therapy. Eight of the nine patients died within one year of diagnosis. One died at 16 months after diagnosis.<sup>17</sup> Therapy generally consisted of surgical excision of the mass lesion with multiagent, systemic chemotherapy. Radiation therapy, alone or with multiagent chemotherapy, was used in several cases. Compared with follicular dendritic neoplasms, IDCS seems to behave more aggressively.<sup>1,40</sup>

The reported cases document the histologic, immunophenotypic, and ultrastructural features of IDCS and expand the known sites of occurrence. Because IDCSs are rare and can show morphologic and immunohistochemical heterogeneity, correct diagnosis requires a high index of suspicion and complete pathologic study.

*From the Departments of <sup>1</sup>Pathology and <sup>2</sup>General Surgery, Walter Reed Army Medical Center, Washington, DC; <sup>3</sup>Pathology, National Cancer Institute, Bethesda, MD; and <sup>4</sup>Hematopathology, Armed Forces Institute of Pathology, Washington, DC.*

*The opinions and assertions contained herein are the private views of the authors and should not be construed as official or reflecting the views of the Department of the Army or Department of Defense.*

*Address reprint requests to Dr Gaertner: Armed Forces Institute of Pathology, Dept of Dermatopathology, 14th St and Alaska Ave NW, Bldg 54, Washington, DC 20307.*

## References

- Andriko JW, Kaldjian EP, Tsokos M, et al. Reticulum cell neoplasms of lymph nodes: a clinicopathologic study of 11 cases with recognition of a new subtype derived from fibroblastic reticular cells. *Am J Surg Pathol*. 1988;22:1048-1058.
- Friess A. Interdigitating reticulum cells in the popliteal lymph node of the rat: an ultrastructural and cytochemical study. *Cell Tissue Res*. 1976;170:43-60.
- Wright-Browne V, McClain K, Talpaz M, et al. Physiology and pathophysiology of dendritic cells. *Hum Pathol*. 1997;28:563-579.
- Stenman R, Pack M, Inaba K. Dendritic cells in the T-cell areas of lymphoid organs. *Immunol Rev*. 1997;156:25-37.
- Gretz JE, Kaldjian EP, Anderson AO, et al. Sophisticated strategies for information encounter in lymph nodes: the reticular network as a conduit of soluble information and a highway for cell traffic. *J Immunol*. 1996;157:495-499.
- Weiss LM, Berry GJ, Dorfman RF, et al. Spindle cell neoplasm of lymph nodes of probable reticulum cell lineage: true reticulum cell sarcoma? *Am J Surg Pathol*. 1990;14:405-414.
- Rousselet M, Francois S, Croue A, et al. A lymph node interdigitating reticulum cell sarcoma. *Arch Pathol Lab Med*. 1994;118:183-188.
- van Heerde P, Feltkamp CA, Feltkamp-Vroom TM, et al. Sarcoma arising from interdigitating cells: cytology and cytochemistry. *Acta Cytol*. 1983;27:306-312.
- Feltkamp CA, van Heerde P, Feltkamp-Vroom TM, et al. A malignant tumor arising from interdigitating cells: light microscopical, ultrastructural, immuno- and enzyme-histochemical characteristics. *Virchows Arch A Pathol Anat Histopathol*. 1981;393:183-192.
- van den Oord JJ, de Wolf-Peters C, de Vos R, et al. Sarcoma arising from interdigitating reticulum cells: report of a case, studied with light and electron microscopy, and enzyme- and immunohistochemistry. *Histopathology*. 1986;10:509-523.
- Nakamura S, Hara K, Suchi T, et al. Interdigitating cell sarcoma: a morphologic, immunohistochemical, and enzyme-histochemical study. *Cancer*. 1988;61:562-568.
- Turner RR, Wood GS, Beckstead JH, et al. Histiocytic malignancies: morphologic, immunologic, and enzymatic heterogeneity. *Am J Surg Pathol*. 1984;8:485-500.
- Lennert K, Mohri N. Histopathology and diagnosis of non-Hodgkin's lymphomas. In: Vehringer E, ed. *Malignant Lymphomas Other Than Hodgkin's Disease*. Berlin, Germany: Springer-Verlag; 1978:448.
- Daum GS, Liepman M, Woda BA. Dendritic cell phenotype in localized malignant histiocytosis of the small intestine. *Arch Pathol Lab Med*. 1985;109:647-650.
- Salisbury JR, Ramsay AD, Isaacson PG. Histiocytic lymphoma: a report of a case with unusual phenotype. *J Pathol*. 1985;146:99-106.
- Rabkin MS, Kjeldsberg CR, Hammond ME, et al. Ultrastructural, immunohistochemical and DNA content analysis of lymphomas having features of interdigitating reticulum cells. *Cancer*. 1988;61:1594-1601.
- Miettinen M, Fletcher S, Croue A, et al. True histiocytic lymphoma of small intestine: analysis of two S-100 protein-positive cases with features of interdigitating reticulum cell sarcoma. *Am J Clin Pathol*. 1993;118:285-292.
- Horschowski N, Guitard AM, Arnoux I, et al. Interdigitating cell sarcoma: occurrence during incomplete remission of a lymphoblastic lymphoma. *Pathol Biol (Paris)*. 1993;41:225-259.
- Yamakawa M, Matsuda M, Imai Y, et al. Lymph node interdigitating cell sarcoma: a case report. *Am J Clin Pathol*. 1992;97:139-146.
- Hammar SP, Rudolph RH, Bockus DE, et al. Interdigitating reticulum cell sarcoma with unusual features. *Ultrastruct Pathol*. 1991;15:631-644.
- Chan WC, Zaatari G. Lymph node interdigitating reticulum cell sarcoma. *Am J Clin Pathol*. 1986;85:739-744.



22. Vasef MA, Zaatari GS, Chan WC, et al. Dendritic cell tumors associated with low-grade B-cell malignancies: report of three cases. *Am J Clin Pathol.* 1995;104:696-701.
23. Hui PK, Feller AC, Kaiserling E, et al. Skin tumors of T accessory cells (interdigitating reticulum cells) with high content of T lymphocytes. *Am J Dermatopathol.* 1987;9:129-137.
24. Banner B, Beauchamp M, Leipman M, et al. Interdigitating reticulum cell sarcoma of the intestine: a case report and review of the literature. *Diagn Cytopathol.* 1997;17:216-222.
25. Luk I, Shek T, Tang V, et al. Interdigitating dendritic cell tumor of the testis: a novel testicular spindle cell neoplasm. *Am J Surg Pathol.* 1999;23:1141-1148.
26. Nakamura S, Suzuki R, Asai J, et al. Observations on the fine structure of interdigitating cell sarcoma. *Virchows Arch A Pathol Anat Histopathol.* 1989;414:121-128.
27. Hsu SM, Yo YS, Hsu PL. Use of avidin-biotin-peroxidase complex (ABC) in immunoperoxidase techniques: a comparison of ABC and unlabelled antibody (PAP) procedures. *J Histochem Cytochem.* 1981;29:577-580.
28. Jaffe R, DeVaughn D, Langhoff E. Fascin and the differential diagnosis of childhood histiocytic lesions. *Pediatr Dev Pathol.* 1998;1:216-221.
29. Said JW, Pinkus JL, Yamashita J, et al. The role of follicular and interdigitating dendritic cells in HIV-related lymphoid hyperplasia: localization of fascin. *Mod Pathol.* 1997;10:421-427.
30. Said JW, Barrera R, Shintaku I, et al. Immunohistochemical analysis of p53 expression in malignant lymphomas. *Am J Pathol.* 1992;141:1343-1348.
31. Korkolopoulou P, Oates J, Kittas C, et al. p53, c-myc p62 and proliferating cell nuclear antigen (PCNA) expression in non-Hodgkin's lymphomas. *J Clin Pathol.* 1994;47:9-14.
32. Steinman R, Pack M, Inaba K. Dendritic cells in T-cell areas of lymphoid organs. *Immunol Rev.* 1997;156:25-37.
33. Wood GS, Tunner RP, Shiurba RA, et al. Human dendritic cells and macrophages: in situ immunophenotypic definition of subsets that exhibit specific morphologic and micro-environmental characteristics. *Am J Pathol.* 1985;119:73-82.
34. Rosenzweig M, Canque B, Gluckman JC. Human dendritic cell differentiation pathway from CD34+ hematopoietic precursor cells. *Blood.* 1996;87:535-544.
35. Perez-Ordóñez B, Erlandson R, Rosai J. Follicular dendritic cell tumor: report of 13 cases of a distinctive entity. *Am J Surg Pathol.* 1996;20:944-955.
36. Monda L, Warnke R, Rosai J. A primary lymph node malignancy with features suggestive of dendritic reticulum cell differentiation: a report of 4 cases. *Am J Clin Pathol.* 1986;149:839-843.
37. Pernick N, DaSilva M, Gangi M, et al. Histiocytic markers in melanoma. *Mod Pathol.* 1999;12:1072-1077.
38. Ben-Ezra J, Bailey A, Azumi N, et al. Malignant histiocytosis X: a distinct clinicopathologic entity. *Cancer.* 1991;68:1050-1060.
39. Favara B, Steele A. Langerhans cell histiocytosis of lymph nodes: a morphologic assessment of 43 biopsies. *Pediatr Pathol Lab Med.* 1997;17:769-787.
40. Fonseca R, Yamakawa M, Nakamura S, et al. Follicular dendritic cell sarcoma and interdigitating reticulum cell sarcoma: a review. *Am J Hematol.* 1998;59:161-167.

# First and Only FDA Cleared Digital Cytology System

**Genius™ Cervical AI**

**Genius™ Review Station**

**Genius™ Digital Imager**

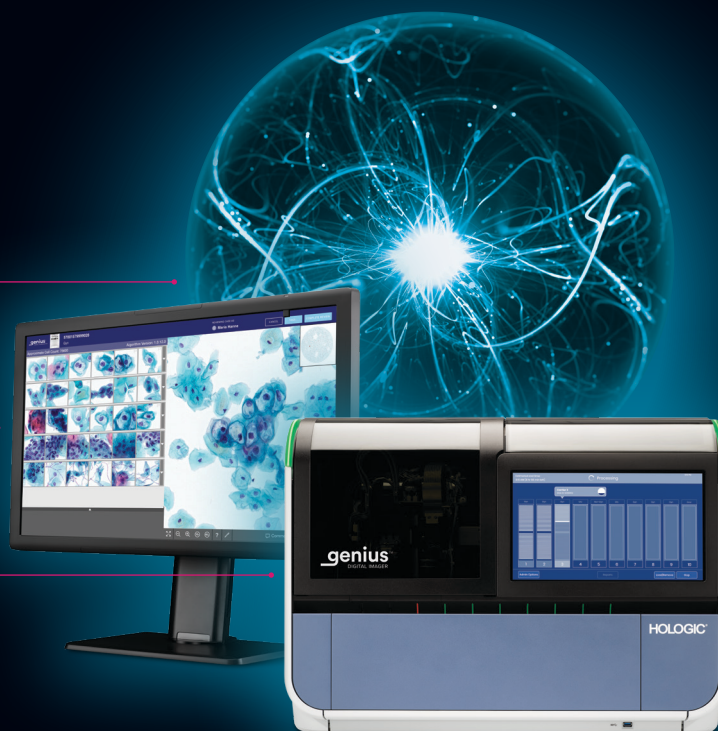

## Empower Your Genius With Ours

**Make a Greater Impact on Cervical Cancer**  
with the Advanced Technology of the  
Genius™ Digital Diagnostics System

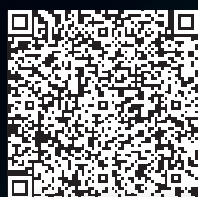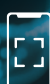

**Click or Scan**  
to discover more

ADS-04159-001 Rev 001 © 2024 Hologic, Inc. All rights reserved. Hologic, Genius, and associated logos are trademarks and/or registered trademarks of Hologic, Inc. and/or its subsidiaries in the United States and/or other countries. This information is intended for medical professionals in the U.S. and other markets and is not intended as a product solicitation or promotion where such activities are prohibited. Because Hologic materials are distributed through websites, podcasts and tradeshows, it is not always possible to control where such materials appear. For specific information on what products are available for sale in a particular country, please contact your Hologic representative or write to [diagnostic.solutions@hologic.com](mailto:diagnostic.solutions@hologic.com).

**genius™**  
DIGITAL DIAGNOSTICS
